# Supplementary material for: Modeling Magnetomyograms of Uterine Contractions during Pregnancy Using a Multiscale Forward Electromagnetic Approach
Source: PubMed Central journal article supplement (PMC4809542; doi:10.1371/journal.pone.0152421), 2016-03-28
Supplement: pone.0152421.s001.pdf [file pone.0152421.s001.pdf]

# Bifurcation Analysis on a Variation of the FitzHugh-Nagumo (FHN) Model

Mengxue Zhang, Vanessa Tidwell, Patricio S. La Rosa, James D Wilson, Hari Eswaran, Arye Nehorai

## Bifurcation analysis

The variation of the FHN equations is represented as

$$\frac{\partial v_m}{\partial t} = \frac{1}{\varepsilon_1 c_m} (k(v_m - v_1)(v_2 - v_m)(v_m - v_3) - w + \nu) \triangleq f_1(v_m, w), \quad (1)$$

$$\frac{\partial w}{\partial t} = \varepsilon_2 (\beta v_m - \gamma w + \delta) \triangleq f_2(v_m, w). \quad (2)$$

The nullclines of the FHN model are given by the following two equations

$$f_1(v_m, w) = 0, \quad (3)$$

$$f_2(v_m, w) = 0. \quad (4)$$

The  $v_m$ -nullcline is a cubic function of  $v_m$ , which is shown as

$$w = k(v_m - v_1)(v_2 - v_m)(v_m - v_3) + \nu, \quad (5)$$

and the  $w$ -nullcline is a straight line as follows:

$$w = \frac{\beta}{\gamma} v_m + \frac{\delta}{\gamma}. \quad (6)$$

The equilibrium of the FHN system is the intersection of these two nullclines, which is defined as  $(v_m^*, w^*)$ . The stimulus amplitude  $\nu$  can then be denoted as a function of the

equilibrium  $v_m^*$  with other parameters fixed:

$$\nu(v_m^*) = -k(v_m^* - v_1)(v_2 - v_m^*)(v_m^* - v_3) + (\beta v_m^* + \delta)/\gamma. \quad (7)$$

We are interested in the case when there is always only one equilibrium in the FHN system whatever the stimulus amplitude  $\nu$ , for which the slope of the  $w$ -nullcline should be greater than the maximal slope of the  $v_m$ -nullcline. The slope of the straight  $w$ -nullcline is  $\frac{\beta}{\gamma}$ , while the maximal slope of the  $v_m$ -nullcline is found at the point  $v_m = \frac{v_1 + v_2 + v_3}{3}$  and it is equal to  $\frac{k(v_1 + v_2 + v_3)^2}{3} - k(v_1 v_2 + v_1 v_3 + v_2 v_3)$ . The condition for the existence and uniqueness of equilibrium is therefore given by:

$$\Delta_1 \triangleq (v_1 + v_2 + v_3)^2 - 3(v_1 v_2 + v_1 v_3 + v_2 v_3) - \frac{3\beta}{k\gamma} < 0. \quad (8)$$

The local stability of the equilibrium is determined by linearization of the nonlinear FHN model at the equilibrium, which is given by

$$\frac{\partial}{\partial t} \mathbf{x} = \mathbf{D} \mathbf{x}, \quad (9)$$

where  $\mathbf{x} = \begin{pmatrix} v_m - v_m^* \\ w - w^* \end{pmatrix}$ , and  $\mathbf{D}$  is the Jacobian matrix at the equilibrium  $(v_m^*, w^*)$ , which is shown as follows:

$$\begin{aligned} \mathbf{D} &= \left( \begin{array}{cc} \frac{\partial f_1(v_m, w)}{\partial v_m} & \frac{\partial f_1(v_m, w)}{\partial w} \\ \frac{\partial f_2(v_m, w)}{\partial v_m} & \frac{\partial f_2(v_m, w)}{\partial w} \end{array} \right) \Bigg|_{(v_m^*, w^*)} \triangleq \begin{pmatrix} f_{1v_m} & f_{1w} \\ f_{2v_m} & f_{2w} \end{pmatrix} \\ &= \begin{pmatrix} \frac{q(v_m^*, v_1, v_2, v_3, k)}{\varepsilon_1 c_m} & -\frac{1}{\varepsilon_1 c_m} \\ \varepsilon_2 \beta & -\varepsilon_2 \gamma \end{pmatrix}, \end{aligned} \quad (10)$$

where  $q(v_m^*, v_1, v_2, v_3, k) = -3k v_m^{*2} + 2k(v_1 + v_2 + v_3)v_m^* - k(v_1 v_2 + v_1 v_3 + v_2 v_3)$ . The solution of Eq. (9) can be represented as

$$\mathbf{x}(t) = \exp(\lambda t) \mathbf{v}, \quad (11)$$

where  $\lambda$  is the eigenvalue of the Jacobian matrix  $D$  and  $v$  is its corresponding eigenvector. By solving the characteristic equation

$$\det(D - \lambda I) = 0, \tag{12}$$

we obtain the relationship between eigenvalue  $\lambda$  and the equilibrium  $v_m^*$ , which is given as follows:

$$\lambda^2 - (f_{1v_m} + f_{2w})\lambda + (f_{1v_m}f_{2w} - f_{1w}f_{2v_m}) = 0. \tag{13}$$

Depending on the values of eigenvalues, we can determine whether the equilibrium is stable or not. Since we are interested in characterizing the stability of equilibrium as a function of model parameters, we need to compute eigenvalues as a function of these parameters and so we assess stability through the evaluation of two conditions as presented in Table 1.

**Table 1. Conditions for the stability of equilibrium**

| Type       | Stability | Eigenvalues ( $\lambda_1$ and $\lambda_2$ )                      | Condition 1               | Condition 2                 |
|------------|-----------|------------------------------------------------------------------|---------------------------|-----------------------------|
| saddle     | unstable  | $\lambda_1 > 0, \lambda_2 < 0$ or $\lambda_1 < 0, \lambda_2 > 0$ | $\lambda_1 \lambda_2 < 0$ |                             |
| node/focus | stable    | $Re(\lambda_1) < 0, Re(\lambda_2) < 0$                           | $\lambda_1 \lambda_2 > 0$ | $\lambda_1 + \lambda_2 < 0$ |
| node/focus | unstable  | $Re(\lambda_1) > 0, Re(\lambda_2) > 0$                           | $\lambda_1 \lambda_2 > 0$ | $\lambda_1 + \lambda_2 > 0$ |

When the node or focus loses stability, it is possible to construct a bounding surface around the unstable equilibrium. According to the Poincaré-Bendixson theorem [1], a limit cycle must exit in the FHN system when the node or focus is unstable. In other words, the behavior of the FHN system changes qualitatively from a stable equilibrium to a limit cycle. Therefore, in order to identify the ranges of  $v_m^*$  so that the FHN system has a limit cycle, we need to compute condition 1 and condition 2 in Table 1 under which the node or focus is unstable, that is,

$$\begin{aligned} \lambda_1 \lambda_2 &= f_{1v_m} f_{2w} - f_{1w} f_{2v_m} \\ &= -\varepsilon_2 \gamma \frac{q(v_m^*, v_1, v_2, v_3, k)}{\varepsilon_1 c_m} + \frac{\varepsilon_2 \beta}{\varepsilon_1 c_m} > 0, \end{aligned} \tag{14}$$

$$\begin{aligned} \lambda_1 + \lambda_2 &= f_{1v_m} + f_{2w} \\ &= \frac{q(v_m^*, v_1, v_2, v_3, k)}{\varepsilon_1 c_m} - \varepsilon_2 \gamma > 0. \end{aligned} \tag{15}$$

With the condition (8), the discriminant of inequality (14) is negative. Therefore,

inequality (14) is satisfied for all  $v_m^*$  so that we only need to consider inequality (15). If the discriminant of the quadratic polynomial in inequality (15) is negative, the inequality is also satisfied for all  $v_m^*$ . In this work, we are interested in the case when the quadratic polynomial has positive discriminant, i.e.,

$$\Delta_2 > 0, \tag{16}$$

where  $\Delta_2 = (v_1 + v_2 + v_3)^2 - 3(v_1v_2 + v_1v_3 + v_2v_3) - \frac{3\varepsilon_1\varepsilon_2c_m\gamma}{k}$ , in which case inequality (15) is satisfied if

$$\frac{v_1 + v_2 + v_3 - \sqrt{\Delta_2}}{3} < v_m^* < \frac{v_1 + v_2 + v_3 + \sqrt{\Delta_2}}{3}. \tag{17}$$

In a word, the equilibrium is unstable and instead the FHN system has a limit cycle if the equilibrium satisfies inequality (17) with the parameters  $v_1, v_2, v_3, k, \beta, \gamma, \varepsilon_1, \varepsilon_2, c_m$  satisfying inequalities (8) and (16). Together with Eq. (7) and inequality (17), we finally obtain the range of the stimulus amplitude  $\nu$  to produce a limit cycle.

At the transition point (the point at which equilibrium loses stability), the real parts of eigenvalues vanish and the eigenvalues are

$$\lambda_{1,2} = \pm i\sqrt{f_{1v_m}f_{2w} - f_{1w}f_{2v_m}}. \tag{18}$$

These eigenvalues correspond to an oscillatory solution, i.e., spike trains, with a frequency given by

$$\begin{aligned} \omega &= \sqrt{f_{1v_m}f_{2w} - f_{1w}f_{2v_m}} \\ &= \sqrt{\frac{\varepsilon_2}{\varepsilon_1c_m}} \sqrt{-\gamma q(v_m^*, v_1, v_2, v_3, k) + \beta}. \end{aligned} \tag{19}$$

According to Eq. (7),  $v_m^*$  in the above equation is a function of  $v_1, v_2, v_3, k, \beta, \delta, \gamma, \nu$ . Hence, the frequency can be represented as

$$\omega = \sqrt{\frac{\varepsilon_2}{\varepsilon_1c_m}} g(v_1, v_2, v_3, k, \beta, \delta, \gamma, \nu), \tag{20}$$

where  $g(v_1, v_2, v_3, k, \beta, \delta, \gamma, \nu) = \sqrt{-\gamma q(v_m^*, v_1, v_2, v_3, k) + \beta}$ , which is a function of  $v_1,$

$v_2, v_3, k, \beta, \delta, \gamma, \nu.$

## References

1. Hale JK, Buttanri H, Kocak H. Dynamics and Bifurcations. Texts in Applied Mathematics. Springer New York; 1996.
